# Supplementary material
Source: Springer Nature journal article supplement (https://www.springermedizin.de/resource/supplementary/12967_2008_291_MOESM4_ESM.pdf/9576124)

(A) Dose response: IFN $\gamma$  response is TIL cell dose dependent (0 to 1 TIL/1000 PBMC)

(B) Expanded dose response: Graph in (A) is expanded to show details at the lower doses

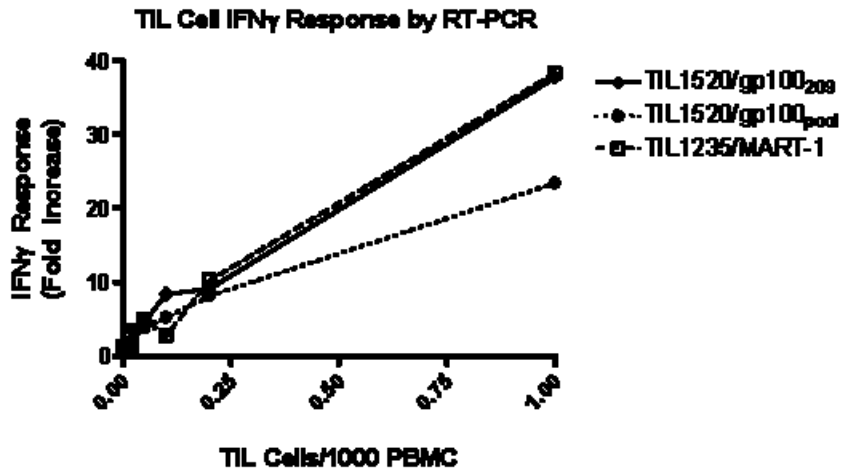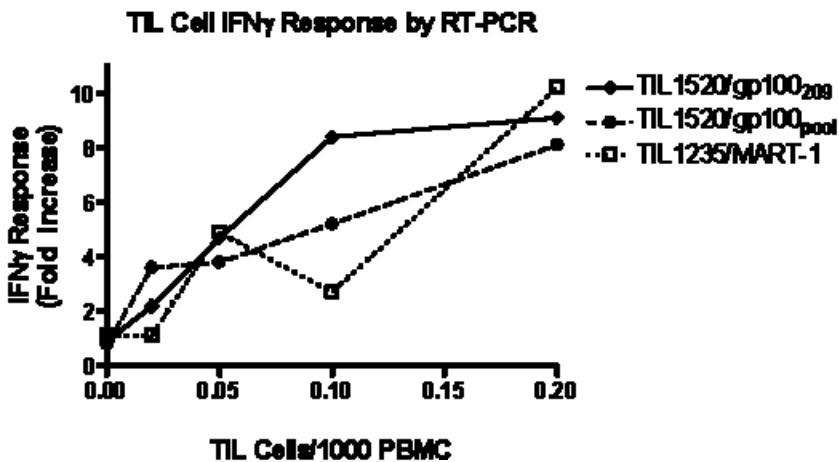

Supplement: MOESM4 [file 9576124]
